# Supplementary material
Source: MDPI journal article supplement (https://www.mdpi.com/2073-4395/11/10/2029)
Supplement: s1 [file s1]

**Table S1.** Description of 37 purple rice landrace accessions and nine check genotypes.

| Rice samples                | Altitude              | Ecotype | Accession no. | Local name                   |
|-----------------------------|-----------------------|---------|---------------|------------------------------|
| Landrace                    | Highlands<br>(>500 m) | Upland  | 002           | Pi I Soo                     |
|                             |                       |         | 032           | Khao Neaw Dum                |
|                             |                       |         | 035           | Khao Neaw Dum                |
|                             |                       |         | 037           | Pi I Soo                     |
|                             |                       |         | 057           | Pi I Soo                     |
|                             |                       |         | 124           | Pi I Soo                     |
|                             |                       |         | 151           | Deaw Ma O Na                 |
|                             |                       |         | 153           | Deaw Ma O Na                 |
|                             |                       |         | 265           | Ja Noo Nae Nae               |
|                             |                       |         | 267           | Ja Noo Nae Nae               |
|                             |                       |         | 270           | Ja Noo Nae Nae               |
|                             |                       |         | 279           | Khao Saeng                   |
|                             |                       |         | 290           | Khao Saeng                   |
|                             |                       |         | 292           | Khao Loog Kery               |
|                             |                       |         | 295           | Ja Nor Na                    |
|                             |                       |         | 297           | Khao Luam Pua                |
|                             |                       |         | 302           | Khao Saeng Mag Bok           |
|                             |                       |         | 311           | Khao Neaw Dum                |
|                             |                       |         | 322           | Chi Nor Na                   |
|                             |                       | Wetland | 065           | MHS065                       |
|                             | Lowlands<br>(<500 m)  | Upland  | 006           | Kum E San                    |
|                             |                       |         | 166           | Ngoa X                       |
|                             |                       |         | 171           | Ple Cha                      |
|                             |                       |         | 190           | Khao Kum                     |
|                             |                       |         | 222           | Ar Cha                       |
|                             |                       |         | 223           | V5 Khao Rai Khao Neaw (1309) |
|                             |                       |         | 227           | V6 Khao Rai Khao Joa (1318)  |
|                             |                       |         | 232           | Pi I Soo                     |
|                             |                       |         | 233           | V9 Khao Rai Khao Neaw 1310   |
|                             |                       |         | 234           | Luam Pua                     |
|                             |                       | Wetland | 189           | Chi Nor Na                   |
|                             |                       |         | 243           | Kum Viet Nam                 |
|                             |                       |         | 244           | 5153                         |
|                             |                       |         | 260           | Bean Koo                     |
|                             |                       |         | 245           | 87061                        |
|                             |                       |         | 250           | Kum Pa Yao                   |
|                             |                       |         | 242           | Kum Viang Sa                 |
| Purple rice<br>check        | Lowlands              | Wetland | RB            | Riceberry                    |
|                             |                       |         | HN            | Hom nin                      |
|                             |                       |         | KDK           | Kum Dai Saket                |
|                             |                       |         | KJ-CMU107     | Kum Jao Morchor 107          |
|                             |                       |         | KH-CMU        | Kum Hom Morchor              |
| Non-pigmented<br>rice check | Lowlands              | Wetland | PTT1          | Pratumthani1                 |
|                             |                       |         | KDML105       | Khao Dok Mali 105            |
|                             |                       |         | RD6           | Rice Department 6            |
|                             |                       |         | SPT1          | Sanpathong1                  |

**Table S2.** Description of the 16 SSR markers used to evaluate genetic diversity of 37 purple rice landrace and nine check genotypes.

| Locus       | Chromosome<br>No. | Primer sequence                                                 | Repeat motif                | Expected size (bp) | Tm (C) | Allele size (bp) | No. of allele | PIC          |
|-------------|-------------------|-----------------------------------------------------------------|-----------------------------|--------------------|--------|------------------|---------------|--------------|
| RM1         | 1                 | F 5'-GCGAAAACACAATGCAAAAA-3'<br>R 5'-GCGTTGGTTCAGCTGAC-3'       | (GA)26                      | 113                | 55     | 77-128           | 4             | 0.449        |
| RM486       | 1                 | F 5'-CCCCCTCTCTCTCTCTC-3'<br>R 5'-TAGCCACATCAACAGCTTG-3'        | (CT)14                      | 104                | 58     | 114-126          | 2             | 0.356        |
| RM208       | 2                 | F 5'-TCTGAAGCCTGTCTGATG-3'<br>R 5'-TAAGTCGATCATGTGTGGACC-3'     | (CT)17                      | 173                | 55     | 167-197          | 3             | 0.298        |
| RM211       | 2                 | F 5'-CCGACTCATCAACCAACTG-3'<br>R 5'-CTTCACGAGGATCTCAAAGG-3'     | (TC)3A(TC)18                | 161                | 55     | 134-150          | 2             | 0.269        |
| RM514       | 3                 | F 5'-AGATTGATCTCCATCCCC-3'<br>R 5'-CACGAGCATATTACTAGTGG-3'      | (AC)12                      | 259                | 53     | 242-279          | 4             | 0.407        |
| RM307       | 4                 | F 5'-GTACTACCGACTACCGTTAC-3'<br>R 5'-CTGCTATGCATGAAGTGCTC-3'    | (AT)14(GT)21                | 174                | 55     | 125-135          | 3             | 0.446        |
| RM161       | 5                 | F 5'-TGAGATGAGAAGCGGCGCTC-3'<br>R 5'-TGTGTCATCAGACGGCGTCCG-3'   | (AG)20                      | 187                | 61     | 173-200          | 2             | 0.351        |
| RM162       | 6                 | F 5'-GCCAGCAAAACCAGGATCCGG-3'<br>R 5'-CAAGGTCTTGTGCGGCTTCCGG-3' | (AC)20                      | 229                | 55     | 223-262          | 3             | 0.577        |
| RM510       | 6                 | F 5'-AACCGGATTAGTTTCTCGCC-3'<br>R 5'-TGAGGACGACGAGCAGATTTC-3'   | (GA)15                      | 122                | 50     | 102-115          | 2             | 0.334        |
| RM11        | 7                 | F 5'-TCTCTCTTCCCCGATC-3'<br>R 5'-ATAGCGGCGAGGCTTAG-3'           | (GA)17                      | 140                | 55     | 131-158          | 2             | 0.351        |
| RM223       | 8                 | F 5'-GAGTGAGCTTGGGCTGAAAC-3'<br>R 5'-GAAGGCAAGTCTTGGCACTG-3'    | (CT)25                      | 165                | 61     | 135-145          | 3             | 0.376        |
| RM339       | 8                 | F 5'-GTAATCGATGCTGTGGGAAG-3'<br>R 5'-GAGTCATGTGATAGCCGATATG-3'  | (CTT)8CCT(CTT)5             | 148                | 55     | 145-197          | 5             | 0.634        |
| RM316       | 9                 | F 5'-CTAGTTGGGCATACGATGCG-3'<br>R 5'-ACGCTTATATGTTACGTCAAC-3'   | (GT)8-<br>(TG)9(TTTG)4(TG)4 | 192                | 55     | 205-224          | 2             | 0.375        |
| RM171       | 10                | F 5'-AACGCGAGGACACGTACTTAC-3'<br>R 5'-ACGAGATACGTACGCCCTTTG-3'  | (GATG)5                     | 328                | 55     | 320-259          | 4             | 0.560        |
| RM287       | 11                | F 5'-TTCCCTGTAAAGAGAAAATC-3'<br>R 5'-GTGTATTTGGTGAAGCAAC-3'     | (GA)21                      | 118                | 55     | 108-130          | 4             | 0.448        |
| RM19        | 12                | F 5'-CAAAAACAGAGCAGATGAC-3'<br>R 5'-CTCAAGATGGACGCCAAGA-3'      | (ATC)10                     | 226                | 55     | 224-263          | 2             | 0.328        |
| <b>Mean</b> |                   |                                                                 |                             |                    |        |                  | <b>2.79</b>   | <b>0.388</b> |

**Table S3.** Standard gamma oryzanol concentration and total gamma oryzanol area obtained from chromatogram for linear regression analysis to determine gamma oryzanol concentration among 37 purple rice landrace accessions and nine check genotypes.

| Standard concentration (mg/ml) | Total area (mAU×min) |
|--------------------------------|----------------------|
| 0.0                            | 0                    |
| 0.1                            | 402621               |
| 0.1                            | 470053               |
| 0.1                            | 468606               |
| 0.1                            | 471895               |
| 0.1                            | 388505               |
| 1.0                            | 4171412              |
| 1.0                            | 4242381              |
| 1.0                            | 4299112              |
| 1.0                            | 4347282              |
| 1.0                            | 4136879              |

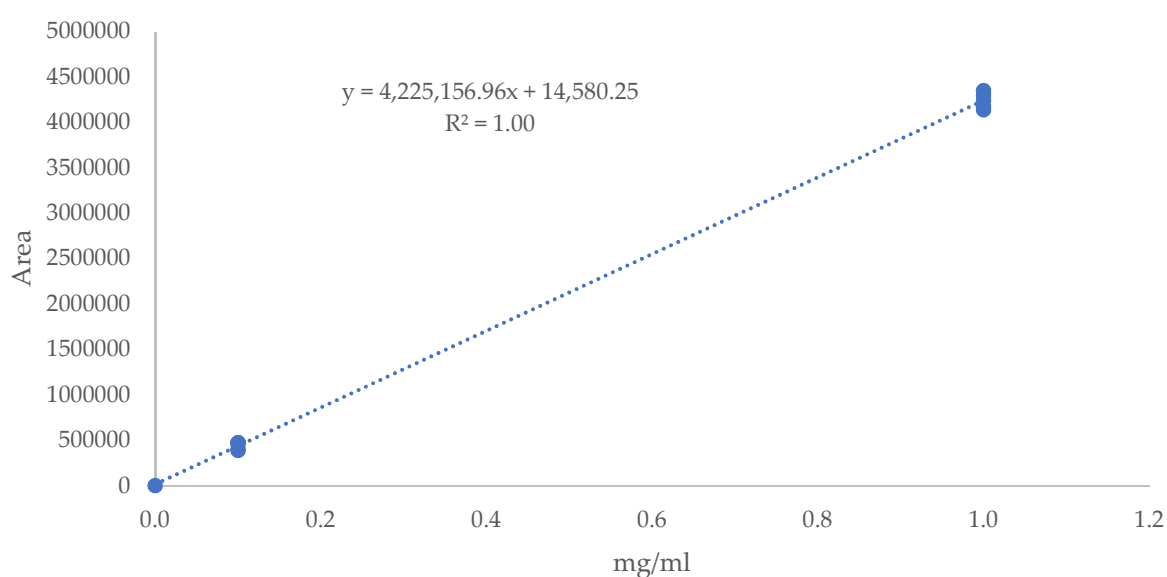

**Figure S1.** Regression analysis between standard concentration and total area peak of gamma oryzanol to determine concentration among 37 purple rice landrace accessions and nine check genotypes.

**Table S4.** Area of total gamma oryzanol obtained from chromatogram for calculating gamma oryzanol concentration based on regression analysis to determine gamma oryzanol concentration among 37 purple rice landrace accessions and nine check genotypes.

| Accession | Replication | Sample weight<br>(g) | Total area | Gamma oryzanol<br>(mg/100g) |
|-----------|-------------|----------------------|------------|-----------------------------|
| 2         | 1           | 5.0                  | 6257250    | 59.1                        |
| 2         | 2           | 5.0                  | 5158709    | 48.7                        |
| 2         | 3           | 5.0                  | 6394567    | 60.4                        |
| 6         | 1           | 5.0                  | 8781781    | 83                          |
| 6         | 2           | 5.0                  | 9014165    | 85.2                        |
| 6         | 3           | 5.0                  | 9880322    | 93.4                        |
| 32        | 1           | 5.0                  | 8105756    | 76.6                        |
| 32        | 2           | 5.0                  | 7704366    | 72.8                        |
| 32        | 3           | 5.0                  | 6996652    | 66.1                        |
| 35        | 1           | 5.0                  | 6310064    | 59.6                        |
| 35        | 2           | 5.0                  | 5496721    | 51.9                        |
| 35        | 3           | 5.0                  | 4704504    | 44.4                        |
| 37        | 1           | 5.0                  | 6278375    | 59.3                        |
| 37        | 2           | 5.0                  | 7482545    | 70.7                        |
| 37        | 3           | 5.0                  | 7503671    | 70.9                        |
| 57        | 1           | 5.0                  | 6479070    | 61.2                        |
| 57        | 2           | 5.0                  | 6035429    | 57                          |
| 57        | 3           | 5.0                  | 6405130    | 60.5                        |
| 65        | 1           | 5.0                  | 6827646    | 64.5                        |
| 65        | 2           | 5.0                  | 6753706    | 63.8                        |
| 65        | 3           | 5.0                  | 6141058    | 58                          |
| 124       | 1           | 5.0                  | 6574136    | 62.1                        |
| 124       | 2           | 5.0                  | 6479070    | 61.2                        |
| 124       | 3           | 5.0                  | 5961489    | 56.3                        |
| 151       | 1           | 5.0                  | 6003740    | 56.7                        |
| 151       | 2           | 5.0                  | 6130495    | 57.9                        |
| 151       | 3           | 5.0                  | 6384004    | 60.3                        |
| 153       | 1           | 5.0                  | 5739668    | 54.2                        |
| 153       | 2           | 5.0                  | 5961489    | 56.3                        |
| 153       | 3           | 5.0                  | 5855860    | 55.3                        |
| 166       | 1           | 5.0                  | 6310064    | 59.6                        |
| 166       | 2           | 5.0                  | 7535360    | 71.2                        |
| 166       | 3           | 5.0                  | 7324102    | 69.2                        |

**Table S4.** Continued

| Accession | Replication | Sample weight<br>(g) | Total area<br>(mAU×min) | Gamma oryzanol<br>(mg/100g) |
|-----------|-------------|----------------------|-------------------------|-----------------------------|
| 171       | 1           | 5.0                  | 6193872                 | 58.5                        |
| 171       | 2           | 5.0                  | 6183309                 | 58.4                        |
| 171       | 3           | 5.0                  | 6943838                 | 65.6                        |
| 189       | 1           | 5.0                  | 6753706                 | 63.8                        |
| 189       | 2           | 5.0                  | 6119932                 | 57.8                        |
| 189       | 3           | 5.0                  | 7133970                 | 67.4                        |
| 190       | 1           | 5.0                  | 6553011                 | 61.9                        |
| 190       | 2           | 5.0                  | 5887548                 | 55.6                        |
| 190       | 3           | 5.0                  | 5665728                 | 53.5                        |
| 222       | 1           | 5.0                  | 7598737                 | 71.8                        |
| 222       | 2           | 5.0                  | 6700891                 | 63.3                        |
| 222       | 3           | 5.0                  | 5792482                 | 54.7                        |
| 223       | 1           | 5.0                  | 7788869                 | 73.6                        |
| 223       | 2           | 5.0                  | 7144533                 | 67.5                        |
| 223       | 3           | 5.0                  | 7186784                 | 67.9                        |
| 227       | 1           | 5.0                  | 7218473                 | 68.2                        |
| 227       | 2           | 5.0                  | 7503671                 | 70.9                        |
| 227       | 3           | 5.0                  | 7535360                 | 71.2                        |
| 232       | 1           | 5.0                  | 7556485                 | 71.4                        |
| 232       | 2           | 5.0                  | 7471982                 | 70.6                        |
| 232       | 3           | 5.0                  | 7894498                 | 74.6                        |
| 233       | 1           | 5.0                  | 6310064                 | 59.6                        |
| 233       | 2           | 5.0                  | 6172747                 | 58.3                        |
| 233       | 3           | 5.0                  | 6193872                 | 58.5                        |
| 234       | 1           | 5.0                  | 7271287                 | 68.7                        |
| 234       | 2           | 5.0                  | 7271287                 | 68.7                        |
| 234       | 3           | 5.0                  | 7640989                 | 72.2                        |
| 242       | 1           | 5.0                  | 10176083                | 96.2                        |
| 242       | 2           | 5.0                  | 9521183                 | 90                          |
| 242       | 3           | 5.0                  | 10049328                | 95                          |
| 243       | 1           | 5.0                  | 11126743                | 105.2                       |
| 243       | 2           | 5.0                  | 11306312                | 106.9                       |
| 243       | 3           | 5.0                  | 10419029                | 98.5                        |
| 244       | 1           | 5.0                  | 9457806                 | 89.4                        |
| 244       | 2           | 5.0                  | 9394429                 | 88.8                        |
| 244       | 3           | 5.0                  | 9743004                 | 92.1                        |

**Table S4.** Continued

| Accession | Replication | Sample weight<br>(g) | Total area<br>(mAU×min) | Gamma oryzanol<br>(mg/100g) |
|-----------|-------------|----------------------|-------------------------|-----------------------------|
| 245       | 1           | 5.0                  | 5750231                 | 54.3                        |
| 245       | 2           | 5.0                  | 6912149                 | 65.3                        |
| 245       | 3           | 5.0                  | 6246687                 | 59                          |
| 250       | 1           | 5.0                  | 11866146                | 112.2                       |
| 250       | 2           | 5.0                  | 12193595                | 115.3                       |
| 250       | 3           | 5.0                  | 11285186                | 106.7                       |
| 260       | 1           | 5.0                  | 7598737                 | 71.8                        |
| 260       | 2           | 5.0                  | 6426256                 | 60.7                        |
| 260       | 3           | 5.0                  | 6933275                 | 65.5                        |
| 265       | 1           | 5.0                  | 7260724                 | 68.6                        |
| 265       | 2           | 5.0                  | 7535360                 | 71.2                        |
| 265       | 3           | 5.0                  | 7894498                 | 74.6                        |
| 267       | 1           | 5.0                  | 7936750                 | 75                          |
| 267       | 2           | 5.0                  | 7588174                 | 71.7                        |
| 267       | 3           | 5.0                  | 7060029                 | 66.7                        |
| 270       | 1           | 5.0                  | 7883935                 | 74.5                        |
| 270       | 2           | 5.0                  | 7102281                 | 67.1                        |
| 270       | 3           | 5.0                  | 7260724                 | 68.6                        |
| 279       | 1           | 5.0                  | 7102281                 | 67.1                        |
| 279       | 2           | 5.0                  | 7693803                 | 72.7                        |
| 279       | 3           | 5.0                  | 7028341                 | 66.4                        |
| 290       | 1           | 5.0                  | 7049467                 | 66.6                        |
| 290       | 2           | 5.0                  | 7281850                 | 68.8                        |
| 290       | 3           | 5.0                  | 8021253                 | 75.8                        |
| 292       | 1           | 5.0                  | 6933275                 | 65.5                        |
| 292       | 2           | 5.0                  | 7831121                 | 74                          |
| 292       | 3           | 5.0                  | 7260724                 | 68.6                        |
| 295       | 1           | 5.0                  | 8454331                 | 79.9                        |
| 295       | 2           | 5.0                  | 7736055                 | 73.1                        |
| 295       | 3           | 5.0                  | 7471982                 | 70.6                        |
| 297       | 1           | 5.0                  | 7493108                 | 70.8                        |
| 297       | 2           | 5.0                  | 7355790                 | 69.5                        |
| 297       | 3           | 5.0                  | 6933275                 | 65.5                        |
| 302       | 1           | 5.0                  | 8686715                 | 82.1                        |
| 302       | 2           | 5.0                  | 8655026                 | 81.8                        |
| 302       | 3           | 5.0                  | 8908536                 | 84.2                        |

**Table S4.** Continued

| Accession | Replication | Sample weight<br>(g) | Total area<br>(mAU×min) | Gamma oryzanol<br>(mg/100g) |
|-----------|-------------|----------------------|-------------------------|-----------------------------|
| 311       | 1           | 5.0                  | 8412080                 | 79.5                        |
| 311       | 2           | 5.0                  | 8137445                 | 76.9                        |
| 311       | 3           | 5.0                  | 8401517                 | 79.4                        |
| 322       | 1           | 5.0                  | 7841684                 | 74.1                        |
| 322       | 2           | 5.0                  | 7831121                 | 74                          |
| 322       | 3           | 5.0                  | 7313539                 | 69.1                        |
| HN        | 1           | 5.0                  | 7524797                 | 71.1                        |
| HN        | 2           | 5.0                  | 7355790                 | 69.5                        |
| HN        | 3           | 5.0                  | 8084630                 | 76.4                        |
| KDK       | 1           | 5.0                  | 8897973                 | 84.1                        |
| KDK       | 2           | 5.0                  | 8211385                 | 77.6                        |
| KDK       | 3           | 5.0                  | 9014165                 | 85.2                        |
| KDML105   | 1           | 5.0                  | 5380530                 | 50.8                        |
| KDML105   | 2           | 5.0                  | 4831259                 | 45.6                        |
| KDML105   | 3           | 5.0                  | 5919237                 | 55.9                        |
| KH-CMU    | 1           | 5.0                  | 6373441                 | 60.2                        |
| KH-CMU    | 2           | 5.0                  | 7577611                 | 71.6                        |
| KH-CMU    | 3           | 5.0                  | 9035290                 | 85.4                        |
| KJ-CMU107 | 1           | 5.0                  | 7556485                 | 71.4                        |
| KJ-CMU107 | 2           | 5.0                  | 7630426                 | 72.1                        |
| KJ-CMU107 | 3           | 5.0                  | 5021391                 | 47.4                        |
| PTT1      | 1           | 5.0                  | 3848910                 | 36.3                        |
| PTT1      | 2           | 5.0                  | 4905199                 | 46.3                        |
| PTT1      | 3           | 5.0                  | 4049605                 | 38.2                        |
| RB        | 1           | 5.0                  | 7165658                 | 67.7                        |
| RB        | 2           | 5.0                  | 7218473                 | 68.2                        |
| RB        | 3           | 5.0                  | 7662114                 | 72.4                        |
| RD6       | 1           | 5.0                  | 4303115                 | 40.6                        |
| RD6       | 2           | 5.0                  | 5127020                 | 48.4                        |
| RD6       | 3           | 5.0                  | 6172747                 | 58.3                        |
| SPT1      | 1           | 5.0                  | 6626951                 | 62.6                        |
| SPT1      | 2           | 5.0                  | 7366353                 | 69.6                        |
| SPT1      | 3           | 5.0                  | 6225561                 | 58.8                        |

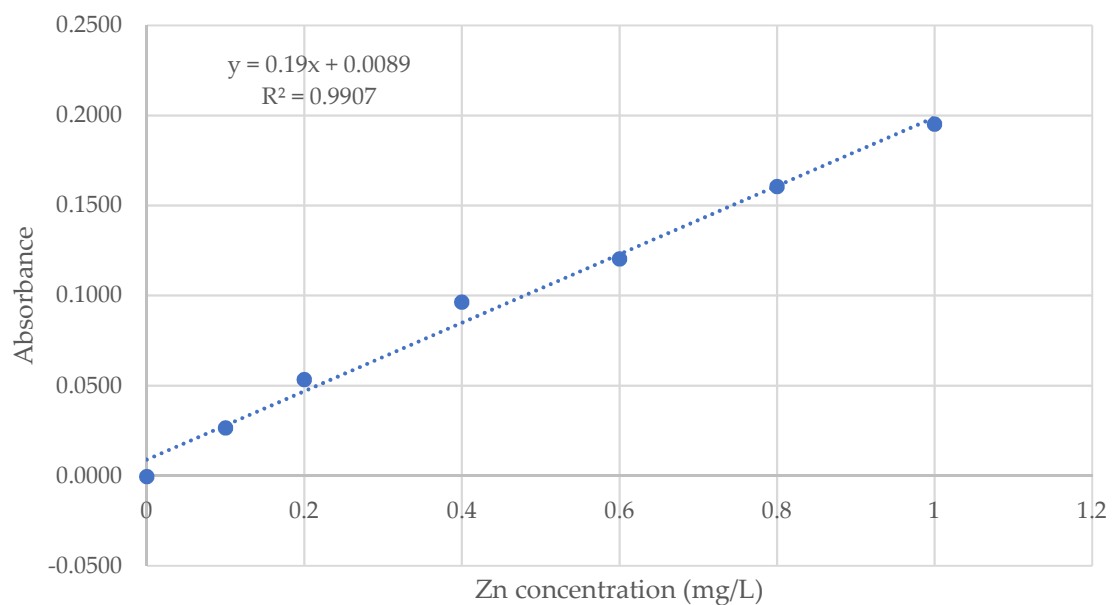

**Figure S2.** Regression analysis between Zn standard concentration and absorbance value from atomic absorption spectrophotometer (AAS) for regression analysis (AAS) to determine Zn concentration among 37 purple rice landrace accessions and nine check genotypes.

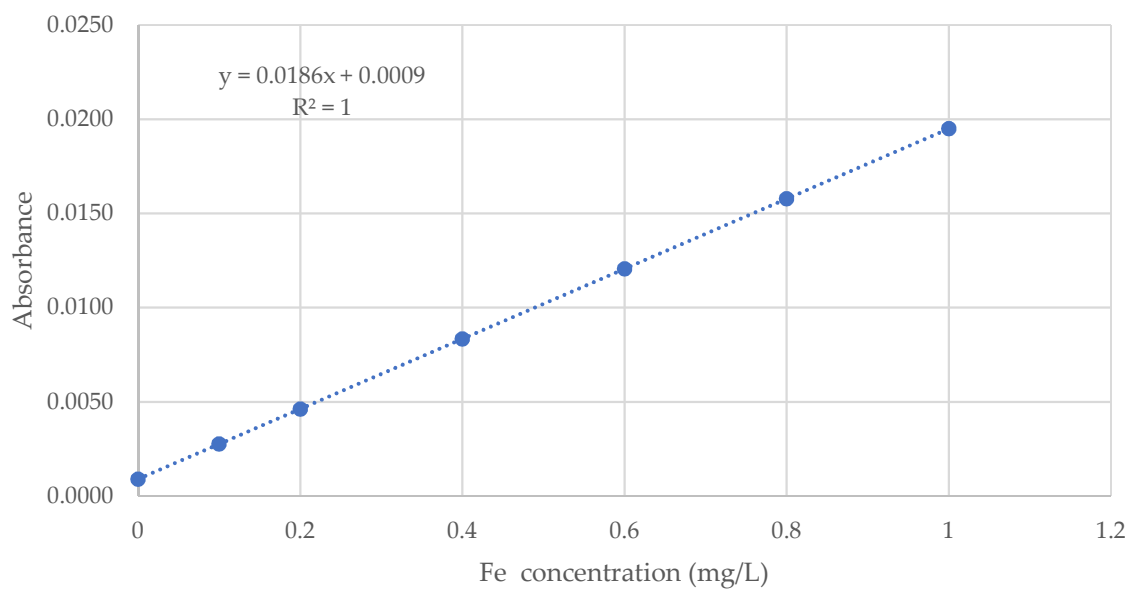

**Figure S3.** Regression analysis between Fe standard concentration and absorbance value from atomic absorption spectrophotometer (AAS) for regression analysis to determine Fe concentration among 37 purple rice landrace accessions and nine check genotypes.



**Table S5.** Zn standard concentration and absorbance obtained from atomic absorption spectrophotometer (AAS) for regression analysis to determined Zn concentration among 37 purple rice landrace accessions and nine check genotypes.

| Sample     | Zn concentration (mg/L) | Absorbance |
|------------|-------------------------|------------|
| Standard 1 | 0                       | -0.0006    |
| Standard 2 | 0.1                     | 0.0265     |
| Standard 3 | 0.2                     | 0.0533     |
| Standard 4 | 0.4                     | 0.0963     |
| Standard 5 | 0.6                     | 0.1204     |
| Standard 6 | 0.8                     | 0.1605     |
| Standard 7 | 1.0                     | 0.1952     |
| Blank1     |                         | 0.0007     |
| Blank2     |                         | 0.0005     |
| Blank3     |                         | 0.0006     |

**Table S6.** Fe standard concentration and absorbance obtained from atomic absorption spectrophotometer (AAS) for regression analysis to determined Zn concentration among 37 purple rice landrace accessions and nine check genotypes.

| Sample     | Fe concentration (mg/L) | Absorbance |
|------------|-------------------------|------------|
| Standard 1 | 0                       | 0.0009     |
| Standard 2 | 1                       | 0.0028     |
| Standard 3 | 2                       | 0.0046     |
| Standard 4 | 3                       | 0.0083     |
| Standard 5 | 4                       | 0.0121     |
| Standard 6 | 5                       | 0.0158     |
| Standard 7 | 10                      | 0.0195     |
| Blank1     |                         | 0.0003     |
| Blank2     |                         | 0.0004     |
| Blank3     |                         | 0.0006     |

**Table S7.** Zn concentration from based on regression analysis of three replications among 37 purple rice landrace accessions and nine check genotypes.

| Accession | Replication | Zn mg/kg |
|-----------|-------------|----------|
| 2         | 1           | 16.2     |
| 2         | 2           | 17.5     |
| 2         | 3           | 17.2     |
| 6         | 1           | 31.8     |
| 6         | 2           | 31.5     |
| 6         | 3           | 31.0     |
| 32        | 1           | 24.1     |
| 32        | 2           | 25.5     |
| 32        | 3           | 25.5     |
| 35        | 1           | 31.7     |
| 35        | 2           | 31.0     |
| 35        | 3           | 31.0     |
| 37        | 1           | 24.7     |
| 37        | 2           | 24.8     |
| 37        | 3           | 25.1     |
| 57        | 1           | 27.8     |
| 57        | 2           | 28.5     |
| 57        | 3           | 27.4     |
| 65        | 1           | 28.7     |
| 65        | 2           | 29.3     |
| 65        | 3           | 29.0     |
| 124       | 1           | 27.9     |
| 124       | 2           | 28.6     |
| 124       | 3           | 27.5     |
| 151       | 1           | 23.7     |
| 151       | 2           | 23.7     |
| 151       | 3           | 23.0     |
| 153       | 1           | 29.0     |
| 153       | 2           | 29.3     |
| 153       | 3           | 28.7     |
| 166       | 1           | 23.3     |
| 166       | 2           | 22.0     |
| 166       | 3           | 22.0     |
| 171       | 1           | 23.3     |
| 171       | 2           | 23.7     |
| 171       | 3           | 23.7     |
| 189       | 1           | 39.0     |
| 189       | 2           | 39.3     |
| 189       | 3           | 38.0     |
| 190       | 1           | 21.0     |
| 190       | 2           | 20.0     |
| 190       | 3           | 20.0     |

**Table S7.** Continued

| Accession | Replication | Zn mg/kg * |
|-----------|-------------|------------|
| 222       | 1           | 21.3       |
| 222       | 2           | 21.7       |
| 222       | 3           | 21.0       |
| 223       | 1           | 20.0       |
| 223       | 2           | 19.0       |
| 223       | 3           | 18.0       |
| 227       | 1           | 19.3       |
| 227       | 2           | 20.7       |
| 227       | 3           | 19.3       |
| 232       | 1           | 25.0       |
| 232       | 2           | 24.7       |
| 232       | 3           | 23.3       |
| 233       | 1           | 19.4       |
| 233       | 2           | 18.9       |
| 233       | 3           | 21.0       |
| 234       | 1           | 27.5       |
| 234       | 2           | 26.9       |
| 234       | 3           | 28.3       |
| 242       | 1           | 24.2       |
| 242       | 2           | 23.1       |
| 242       | 3           | 23.9       |
| 243       | 1           | 24.7       |
| 243       | 2           | 25.5       |
| 243       | 3           | 24.6       |
| 244       | 1           | 31.2       |
| 244       | 2           | 32.8       |
| 244       | 3           | 30.2       |
| 245       | 1           | 27.8       |
| 245       | 2           | 28.2       |
| 245       | 3           | 26.5       |
| 250       | 1           | 24.9       |
| 250       | 2           | 24.1       |
| 250       | 3           | 25.3       |
| 260       | 1           | 23.0       |
| 260       | 2           | 23.0       |
| 260       | 3           | 24.7       |
| 265       | 1           | 19.4       |
| 265       | 2           | 19.2       |
| 265       | 3           | 19.4       |
| 267       | 1           | 28.1       |
| 267       | 2           | 27.3       |
| 267       | 3           | 25.9       |
| 270       | 1           | 24.3       |
| 270       | 2           | 24.0       |
| 270       | 3           | 25.5       |

**Table S7.** Continued

| Accession | Replication | Zn mg/kg * |
|-----------|-------------|------------|
| 279       | 1           | 29.0       |
| 279       | 2           | 27.3       |
| 279       | 3           | 27.7       |
| 290       | 1           | 25.3       |
| 290       | 2           | 26.7       |
| 290       | 3           | 24.3       |
| 292       | 1           | 29.7       |
| 292       | 2           | 28.3       |
| 292       | 3           | 28.0       |
| 295       | 1           | 28.3       |
| 295       | 2           | 27.7       |
| 295       | 3           | 28.0       |
| 297       | 1           | 27.0       |
| 297       | 2           | 28.7       |
| 297       | 3           | 27.0       |
| 302       | 1           | 21.5       |
| 302       | 2           | 21.3       |
| 302       | 3           | 21.0       |
| 311       | 1           | 17.7       |
| 311       | 2           | 18.3       |
| 311       | 3           | 18.3       |
| 322       | 1           | 30.3       |
| 322       | 2           | 29.3       |
| 322       | 3           | 30.0       |
| HN        | 1           | 31.7       |
| HN        | 2           | 31.7       |
| HN        | 3           | 31.5       |
| KDK       | 1           | 24.0       |
| KDK       | 2           | 24.0       |
| KDK       | 3           | 22.7       |
| KDML105   | 1           | 24.9       |
| KDML105   | 2           | 24.9       |
| KDML105   | 3           | 24.4       |
| KH-CMU    | 1           | 26.8       |
| KH-CMU    | 2           | 27.2       |
| KH-CMU    | 3           | 26.2       |
| KJ-CMU107 | 1           | 31.2       |
| KJ-CMU107 | 2           | 31.5       |
| KJ-CMU107 | 3           | 31.3       |
| PTT1      | 1           | 15.6       |
| PTT1      | 2           | 15.0       |
| PTT1      | 3           | 14.9       |
| RB        | 1           | 31.7       |
| RB        | 2           | 31.0       |
| RB        | 3           | 31.0       |

**Table S7.** Continued

| Accession | Zn mg/kg * |
|-----------|------------|
| RD6       | 25.8       |
| RD6       | 25.8       |
| RD6       | 25.1       |
| SPT1      | 22.7       |
| SPT1      | 24.2       |
| SPT1      | 23.7       |

**Table S8.** Fe concentration from based on regression analysis of three replications among 37 purple rice landrace accessions and nine check genotypes.

| Accession | Replication | Fe mg/kg |
|-----------|-------------|----------|
| 2         | 1           | 9.5      |
| 2         | 2           | 9.1      |
| 2         | 3           | 9.4      |
| 6         | 1           | 10.8     |
| 6         | 2           | 11.0     |
| 6         | 3           | 10.0     |
| 32        | 1           | 14.4     |
| 32        | 2           | 13.2     |
| 32        | 3           | 14.2     |
| 35        | 1           | 14.4     |
| 35        | 2           | 13.8     |
| 35        | 3           | 14.1     |
| 37        | 1           | 14.1     |
| 37        | 2           | 13.3     |
| 37        | 3           | 13.4     |
| 57        | 1           | 14.5     |
| 57        | 2           | 15.6     |
| 57        | 3           | 15.2     |
| 65        | 1           | 13.0     |
| 65        | 2           | 12.7     |
| 65        | 3           | 11.1     |
| 124       | 1           | 13.5     |
| 124       | 2           | 12.9     |
| 124       | 3           | 13.2     |
| 151       | 1           | 14.5     |
| 151       | 2           | 14.5     |
| 151       | 3           | 15.0     |
| 153       | 1           | 15.1     |
| 153       | 2           | 14.9     |
| 153       | 3           | 14.2     |
| 166       | 1           | 13.5     |
| 166       | 2           | 13.0     |
| 166       | 3           | 13.2     |
| 171       | 1           | 13.7     |
| 171       | 2           | 13.5     |
| 171       | 3           | 13.6     |
| 189       | 1           | 15.5     |
| 189       | 2           | 15.0     |
| 189       | 3           | 14.6     |

**Table S8.** Continued

| Accession | Replication | Fe mg/kg |
|-----------|-------------|----------|
| 190       | 1           | 10.7     |
| 190       | 2           | 10.3     |
| 190       | 3           | 10.7     |
| 222       | 1           | 13.0     |
| 222       | 2           | 13.0     |
| 222       | 3           | 12.5     |
| 223       | 1           | 12.0     |
| 223       | 2           | 11.5     |
| 223       | 3           | 13.1     |
| 227       | 1           | 15.3     |
| 227       | 2           | 14.8     |
| 227       | 3           | 15.2     |
| 232       | 1           | 11.5     |
| 232       | 2           | 11.2     |
| 232       | 3           | 12.2     |
| 233       | 1           | 10.9     |
| 233       | 2           | 11.0     |
| 233       | 3           | 10.5     |
| 234       | 1           | 14.4     |
| 234       | 2           | 13.3     |
| 234       | 3           | 14.0     |
| 242       | 1           | 12.7     |
| 242       | 2           | 11.0     |
| 242       | 3           | 11.9     |
| 243       | 1           | 9.3      |
| 243       | 2           | 9.6      |
| 243       | 3           | 9.3      |
| 244       | 1           | 8.6      |
| 244       | 2           | 10.0     |
| 244       | 3           | 9.6      |
| 245       | 1           | 9.8      |
| 245       | 2           | 10.4     |
| 245       | 3           | 10.1     |
| 250       | 1           | 11.4     |
| 250       | 2           | 10.2     |
| 250       | 3           | 11.4     |
| 260       | 1           | 14.2     |
| 260       | 2           | 15.0     |
| 260       | 3           | 14.7     |
| 265       | 1           | 12.7     |
| 265       | 2           | 12.4     |
| 265       | 3           | 12.9     |

**Table S8.** Continued

| Accession | Replication | Fe mg/kg |
|-----------|-------------|----------|
| 267       | 1           | 15.2     |
| 267       | 2           | 15.6     |
| 267       | 3           | 14.9     |
| 270       | 1           | 14.4     |
| 270       | 2           | 14.3     |
| 270       | 3           | 14.8     |
| 279       | 1           | 12.5     |
| 279       | 2           | 11.9     |
| 279       | 3           | 12.7     |
| 290       | 1           | 10.9     |
| 290       | 2           | 11.4     |
| 290       | 3           | 9.9      |
| 292       | 1           | 14.1     |
| 292       | 2           | 14.0     |
| 292       | 3           | 13.1     |
| 295       | 1           | 13.3     |
| 295       | 2           | 13.0     |
| 295       | 3           | 12.5     |
| 297       | 1           | 12.2     |
| 297       | 2           | 11.4     |
| 297       | 3           | 11.9     |
| 302       | 1           | 8.4      |
| 302       | 2           | 7.6      |
| 302       | 3           | 7.6      |
| 311       | 1           | 9.9      |
| 311       | 2           | 11.2     |
| 311       | 3           | 9.5      |
| 322       | 1           | 11.8     |
| 322       | 2           | 11.8     |
| 322       | 3           | 12.5     |
| HN        | 1           | 10.9     |
| HN        | 2           | 11.6     |
| HN        | 3           | 12.1     |
| KDK       | 1           | 7.3      |
| KDK       | 2           | 8.1      |
| KDK       | 3           | 7.4      |
| KDML105   | 1           | 9.4      |
| KDML105   | 2           | 9.9      |
| KDML105   | 3           | 9.0      |
| KH-CMU    | 1           | 19.1     |
| KH-CMU    | 2           | 19.9     |
| KH-CMU    | 3           | 18.7     |



**Table S8.** Continued

| Accession | Replication | Fe mg/kg |
|-----------|-------------|----------|
| KJ-CMU107 | 1           | 10.6     |
| KJ-CMU107 | 2           | 11.2     |
| KJ-CMU107 | 3           | 10.8     |
| PTT1      | 1           | 5.1      |
| PTT1      | 2           | 6.2      |
| PTT1      | 3           | 5.9      |
| RB        | 1           | 11.0     |
| RB        | 2           | 11.8     |
| RB        | 3           | 11.0     |
| RD6       | 1           | 6.8      |
| RD6       | 2           | 6.4      |
| RD6       | 3           | 6.7      |
| SPT1      | 1           | 6.1      |
| SPT1      | 2           | 6.0      |
| SPT1      | 3           | 6.8      |

**Table S9.** No of allele and expected heterozygosity of 37 purple rice landrace accessions and nine check genotypes using 16 SSRs markers.

| Rice samples                | Altitude              | Ecotype | Accession | Local name                   | Na  | <i>h</i> |
|-----------------------------|-----------------------|---------|-----------|------------------------------|-----|----------|
| Landrace                    | Highlands<br>(>500 m) | Upland  | 2         | Pi I Soo                     | 1.0 | 0        |
|                             |                       |         | 32        | Khao Neaw Dum                | 1.0 | 0        |
|                             |                       |         | 35        | Khao Neaw Dum                | 1.2 | 0.08     |
|                             |                       |         | 37        | Pi I Soo                     | 1.0 | 0        |
|                             |                       |         | 57        | Pi I Soo                     | 1.0 | 0        |
|                             |                       |         | 124       | Pi I Soo                     | 1.1 | 0.02     |
|                             |                       |         | 151       | Deaw Ma O Na                 | 1.0 | 0        |
|                             |                       |         | 153       | Deaw Ma O Na                 | 1.5 | 0.16     |
|                             |                       |         | 265       | Ja Noo Nae Nae               | 1.0 | 0        |
|                             |                       |         | 267       | Ja Noo Nae Nae               | 1.1 | 0.05     |
|                             |                       |         | 270       | Ja Noo Nae Nae               | 1.1 | 0.03     |
|                             |                       |         | 279       | Khao Saeng                   | 1.1 | 0.03     |
|                             |                       |         | 290       | Khao Saeng                   | 1.0 | 0        |
|                             |                       |         | 292       | Khao Loog Kery               | 1.0 | 0        |
|                             |                       |         | 295       | Ja Nor Na                    | 1.1 | 0.04     |
|                             |                       |         | 297       | Khao Luam Pua                | 1.0 | 0        |
|                             |                       |         | 302       | Khao Saeng Mag Bok           | 1.1 | 0.02     |
|                             |                       |         | 311       | Khao Neaw Dum                | 1.5 | 0.22     |
|                             |                       |         | 322       | Chi Nor Na                   | 1.1 | 0.02     |
|                             |                       | Wetland | 65        | MHS065                       | 1.1 | 0.03     |
|                             | Lowlands<br>(<500 m)  | Upland  | 6         | Kum E San                    | 1.1 | 0.03     |
|                             |                       |         | 166       | Ngoa X                       | 1.1 | 0.02     |
|                             |                       |         | 171       | Ple Cha                      | 1.1 | 0.02     |
|                             |                       |         | 190       | Khao Kum                     | 1.1 | 0.05     |
|                             |                       |         | 222       | Ar Cha                       | 1.0 | 0        |
|                             |                       |         | 223       | V5 Khao Rai Khao Neaw (1309) | 1.0 | 0        |
|                             |                       |         | 227       | V6 Khao Rai Khao Joa (1318)  | 1.0 | 0        |
|                             |                       |         | 232       | Pi I Soo                     | 1.1 | 0.02     |
|                             |                       |         | 233       | V9 Khao Rai Khao Neaw 1310   | 1.1 | 0.02     |
|                             |                       |         | 234       | Luam Pua                     | 1.3 | 0.08     |
|                             |                       | Wetland | 189       | Chi Nor Na                   | 1.3 | 0.11     |
|                             |                       |         | 243       | Kum Viet Nam                 | 1.0 | 0        |
|                             |                       |         | 244       | 5153                         | 1.0 | 0        |
|                             |                       |         | 260       | Bean Koo                     | 1.1 | 0.04     |
|                             |                       |         | 245       | 87061                        | 1.2 | 0.08     |
|                             |                       |         | 250       | Kum Pa Yao                   | 1.1 | 0.02     |
|                             |                       |         | 242       | Kum Viang Sa                 | 1   | 0        |
| Purple rice<br>check        | Lowland               | Wetland | RB        | Riceberry                    | 1   | 0        |
|                             |                       |         | HN        | Hom nin                      | 1   | 0.00     |
|                             |                       |         | KDK       | Kum Dai Saket                | 1   | 0        |
|                             |                       |         | KJ-CMU107 | Kum Jao Morchor 107          | 1   | 0        |
|                             |                       |         | KH-CMU    | Kum Hom Morchor              | 1   | 0        |
| Non-pigmented<br>rice check | Lowlands              | Wetland | PTT1      | Pratumthani1                 | 1   | 0        |
|                             |                       |         | KDML105   | Khao Dok Mali 105            | 1   | 0        |
|                             |                       |         | RD6       | Rice Department 6            | 1   | 0        |
|                             |                       |         | SPT1      | Sanpathong1                  | 1   | 0        |

Na; number of alleles per locus, *h*; expected heterozygosity

**Table S10.** Mean and standard error of mean (SE) of anthocyanin and gamma oryzanol concentration of 37 purple rice landrace accessions and nine check genotypes with their mean of three replications.

| Rice samples                | Altitude             | Ecotype | Accession | Anthocyanin (mg/100g) |     | Gamma oryzanol (mg/100g) |     |
|-----------------------------|----------------------|---------|-----------|-----------------------|-----|--------------------------|-----|
|                             |                      |         |           | Mean                  | SE  | Mean                     | SE  |
| Landrace                    | Highland<br>(>500 m) | Upland  | 2         | 0.5                   | 0.1 | 56.1                     | 3.7 |
|                             |                      |         | 32        | 13.6                  | 0.1 | 71.8                     | 3.1 |
|                             |                      |         | 35        | 13.5                  | 0.4 | 52.0                     | 4.4 |
|                             |                      |         | 37        | 15.3                  | 0.2 | 67.0                     | 3.9 |
|                             |                      |         | 57        | 16.0                  | 0.2 | 59.6                     | 1.3 |
|                             |                      |         | 124       | 4.4                   | 0.2 | 59.8                     | 1.8 |
|                             |                      |         | 151       | 3.6                   | 0.3 | 58.3                     | 1.1 |
|                             |                      |         | 153       | 8.6                   | 0.2 | 55.3                     | 0.6 |
|                             |                      |         | 265       | 5.1                   | 0.3 | 71.5                     | 1.7 |
|                             |                      |         | 267       | 3.7                   | 0.2 | 71.1                     | 2.4 |
|                             |                      |         | 270       | 7.1                   | 0.6 | 70.1                     | 2.2 |
|                             |                      |         | 279       | 8.2                   | 0.1 | 68.7                     | 2.0 |
|                             |                      |         | 290       | 7.6                   | 0.1 | 70.4                     | 2.8 |
|                             |                      |         | 292       | 2.7                   | 0.1 | 69.4                     | 2.5 |
|                             |                      |         | 295       | 5.7                   | 0.3 | 74.5                     | 2.8 |
|                             |                      |         | 297       | 7.8                   | 0.7 | 68.6                     | 1.6 |
|                             |                      |         | 302       | 3.8                   | 0.4 | 82.7                     | 0.8 |
|                             |                      |         | 311       | 1.6                   | 0.2 | 78.6                     | 0.8 |
|                             |                      |         | 322       | 5.1                   | 0.4 | 72.4                     | 1.6 |
|                             | Lowland<br>(<500 m)  | Wetland | 65        | 2.9                   | 0.0 | 62.1                     | 2.1 |
|                             |                      | Upland  | 6         | 4.4                   | 0.3 | 87.2                     | 3.2 |
|                             |                      |         | 166       | 8.3                   | 0.5 | 66.7                     | 3.6 |
|                             |                      |         | 171       | 8.5                   | 0.6 | 60.8                     | 2.4 |
|                             |                      |         | 190       | 1.3                   | 0.0 | 57.0                     | 2.5 |
|                             |                      |         | 222       | 6.4                   | 0.4 | 63.3                     | 4.9 |
|                             |                      |         | 223       | 7.9                   | 0.5 | 69.6                     | 2.0 |
|                             |                      |         | 227       | 4.6                   | 0.4 | 70.1                     | 1.0 |
|                             |                      |         | 232       | 11.6                  | 0.2 | 72.2                     | 1.2 |
|                             |                      |         | 233       | 7.7                   | 0.5 | 58.8                     | 0.4 |
|                             |                      |         | 234       | 4.1                   | 0.2 | 69.8                     | 1.2 |
|                             |                      | Wetland | 189       | 4.0                   | 0.4 | 63.0                     | 2.8 |
|                             |                      |         | 243       | 3.5                   | 0.4 | 103.6                    | 2.6 |
|                             |                      |         | 244       | 11.2                  | 0.3 | 90.1                     | 1.0 |
|                             |                      |         | 260       | 7.3                   | 0.6 | 66.0                     | 3.2 |
|                             |                      |         | 245       | 2.6                   | 0.6 | 59.5                     | 3.2 |
|                             |                      |         | 250       | 10.7                  | 0.4 | 111.4                    | 2.5 |
|                             |                      |         | 242       | 10.8                  | 0.5 | 93.7                     | 1.9 |
| Purple rice<br>check        | Lowland              | Wetland | RB        | 0.7                   | 0.2 | 69.4                     | 1.5 |
|                             |                      |         | HN        | 1.1                   | 0.3 | 72.3                     | 2.1 |
|                             |                      |         | KDK       | 13.3                  | 0.1 | 82.3                     | 2.4 |
|                             |                      |         | KJ-CMU107 | 10.7                  | 0.2 | 63.6                     | 8.1 |
|                             |                      | Upland  | KH-CMU    | 12.5                  | 0.1 | 72.4                     | 7.3 |
| Non-pigmented<br>rice check | Lowland              | Wetland | PTT1      | nd                    |     | 40.3                     | 3.1 |
|                             |                      |         | KDML105   | nd                    |     | 50.8                     | 3.0 |
|                             |                      |         | RD6       | nd                    |     | 49.1                     | 5.1 |
|                             |                      |         | SPT1      | nd                    |     | 63.7                     | 3.2 |

**Table S11.** Mean and standard error of mean (SE) of Fe and Zn concentration of 37 purple rice landrace accessions and nine check genotypes with their mean of three replications.

| Rice samples                | Altitude             | Ecotype | Accession | Fe (mg/kg) |     | Zn (mg/kg) |     |
|-----------------------------|----------------------|---------|-----------|------------|-----|------------|-----|
|                             |                      |         |           | Mean       | SE  | Mean       | SE  |
| Landrace                    | Highland<br>(>500 m) | Upland  | 2         | 9.3        | 0.1 | 16.9       | 0.4 |
|                             |                      |         | 32        | 13.9       | 0.4 | 25.0       | 0.5 |
|                             |                      |         | 35        | 14.1       | 0.2 | 31.2       | 0.2 |
|                             |                      |         | 37        | 13.6       | 0.3 | 24.9       | 0.1 |
|                             |                      |         | 57        | 15.1       | 0.3 | 27.9       | 0.3 |
|                             |                      |         | 124       | 13.2       | 0.2 | 28.0       | 0.3 |
|                             |                      |         | 151       | 14.7       | 0.2 | 23.4       | 0.2 |
|                             |                      |         | 153       | 14.7       | 0.3 | 29.0       | 0.2 |
|                             |                      |         | 265       | 12.7       | 0.1 | 19.3       | 0.0 |
|                             |                      |         | 267       | 15.2       | 0.2 | 27.1       | 0.7 |
|                             |                      |         | 270       | 14.5       | 0.1 | 24.6       | 0.5 |
|                             |                      |         | 279       | 12.4       | 0.3 | 28.0       | 0.5 |
|                             |                      |         | 290       | 10.8       | 0.4 | 25.4       | 0.7 |
|                             |                      |         | 292       | 13.7       | 0.3 | 28.7       | 0.5 |
|                             |                      |         | 295       | 12.9       | 0.2 | 28.0       | 0.2 |
|                             |                      |         | 297       | 11.8       | 0.2 | 27.6       | 0.6 |
|                             |                      |         | 302       | 7.8        | 0.3 | 21.3       | 0.1 |
|                             |                      |         | 311       | 10.2       | 0.5 | 18.1       | 0.2 |
|                             |                      |         | 322       | 12.0       | 0.2 | 29.9       | 0.3 |
|                             | Lowland<br>(<500 m)  | Wetland | 65        | 12.3       | 0.6 | 29.0       | 0.2 |
|                             |                      | Upland  | 6         | 10.6       | 0.3 | 31.4       | 0.2 |
|                             |                      |         | 166       | 13.2       | 0.2 | 22.4       | 0.4 |
|                             |                      |         | 171       | 13.6       | 0.0 | 23.6       | 0.1 |
|                             |                      |         | 190       | 10.6       | 0.1 | 20.3       | 0.3 |
|                             |                      |         | 222       | 12.8       | 0.2 | 21.3       | 0.2 |
|                             |                      |         | 223       | 12.2       | 0.5 | 19.0       | 0.6 |
|                             |                      |         | 227       | 15.1       | 0.2 | 19.8       | 0.4 |
|                             |                      |         | 232       | 11.6       | 0.3 | 24.3       | 0.5 |
|                             |                      |         | 233       | 10.8       | 0.1 | 19.8       | 0.6 |
|                             |                      |         | 234       | 13.9       | 0.3 | 27.6       | 0.4 |
|                             |                      | Wetland | 189       | 15.1       | 0.2 | 38.8       | 0.4 |
|                             |                      |         | 243       | 9.4        | 0.1 | 24.9       | 0.3 |
|                             |                      |         | 244       | 9.4        | 0.4 | 31.4       | 0.8 |
|                             |                      |         | 260       | 14.6       | 0.2 | 23.6       | 0.6 |
|                             |                      |         | 245       | 10.1       | 0.2 | 27.5       | 0.5 |
|                             |                      |         | 250       | 11.0       | 0.4 | 24.8       | 0.4 |
|                             |                      |         | 242       | 11.9       | 0.5 | 23.7       | 0.3 |
| Purple rice<br>check        | Lowland              | Wetland | RB        | 11.3       | 0.3 | 31.2       | 0.2 |
|                             |                      |         | HN        | 11.5       | 0.3 | 31.6       | 0.1 |
|                             |                      |         | KDK       | 7.6        | 0.2 | 23.6       | 0.4 |
|                             |                      |         | KJ-CMU107 | 10.9       | 0.2 | 31.3       | 0.1 |
|                             |                      | Upland  | KH-CMU    | 19.2       | 0.3 | 26.7       | 0.3 |
| Non-pigmented<br>rice check | Lowland              | Wetland | PTT1      | 5.7        | 0.3 | 15.2       | 0.2 |
|                             |                      |         | KDML105   | 9.4        | 0.2 | 24.7       | 0.2 |
|                             |                      |         | RD6       | 6.6        | 0.1 | 25.6       | 0.2 |
|                             |                      |         | SPT1      | 6.3        | 0.2 | 23.5       | 0.4 |
